# Supplementary material for: Characterization of humic acids extracted from a lignite and interpretation for the mass spectra
Source: Royal Society of Chemistry journal article supplement (doi:10.1039/c7ra01497j), 2017-01-01
Supplement: c7ra01497j1.pdf [file c7ra01497j1.pdf]

## Characterization of humic acids extracted from a lignite and interpretation for the mass spectra

Chu-Fan Wang<sup>a</sup>, Xing Fan<sup>\*a</sup>, Fan Zhang<sup>a</sup>, Shou-Ze Wang<sup>a</sup>, Yun-Peng Zhao<sup>a</sup>, Xiao-Yan Zhao<sup>a</sup>, Wei Zhao<sup>a</sup>, Teng-Gao Zhu<sup>b</sup>, Jin-Li Lu<sup>c</sup>, Xian-Yong Wei<sup>\*a</sup>

<sup>a</sup> Key Laboratory of Coal Processing and Efficient Utilization (Ministry of Education),  
China University of Mining & Technology, Xuzhou, Jiangsu 221116, China

<sup>b</sup> Jiangxi Key Laboratory For Mass Spectrometry and Instrumentation, East China  
Institute of Technology, Nanchang, Jiangxi 330013, China

<sup>c</sup> News Center of CUMT, China University of Mining & Technology, Jiangsu 221116,  
China

<sup>\*</sup>Corresponding author Xing Fan at: School of Chemical Engineering and Technology,  
China University of Mining & Technology, Xuzhou, Jiangsu 221116, China; Tel:  
+86-13337938221; E-mail: fanxing@cumt.edu.cn. Xian-Yong Wei at: Key  
Laboratory of Coal Processing and Efficient Utilization, China University of Mining  
& Technology, Xuzhou, Jiangsu 221116, China; Tel: +86-516-83885951; E-mail:  
wei\_xianyong@163.com.

### Single factor experiments

Humic acids yield (Y %) is defined as the weight percentage of the humic acids ( $W_{HA}$ ) relative to the weight of raw coal sample ( $W_R$ ) (Eq. (1)).

$$Y\% = W_{HA}/W_R (1-M_{ad}-A_d) \times 100\% \quad (1)$$

$M_{ad}$  = moisture (air dried base);  $A_d$  = ash (dry base);

Single factor experiments were conducted to test the effects on humic acids yield via the following four factors, dosage of alkali (factor A), reaction time (factor B), dosage of water (factor C) and reaction temperature (factor D). A factor was regulated during the experiments while keeping other three factors constant. For example, the alkali consumption (factor A) dependence of humic acids yield was measured between 0.05 g and 0.25 g (Figure S1 a). The optimal amount of alkali with the highest yield of humic acids was around 0.20 g. Thus factor A can narrow to a optimized range (0.15 g to 0.25 g) to simplify calculation process of the following orthogonal array experiment.<sup>1</sup>

### Orthogonal array experiment

According to the preliminary results from single factor experiments, the measurement range of each factor has been confirmed (Table S1) and will be optimized in orthogonal array experiment ( $L_93^4$ ).

There are two important parameters in orthogonal array experiment:  $K_{ji}$  and  $R_j$ .  $K_{ji}$  is defined as the sum of humic acids yield at all of the levels ( $i = 1, 2, 3$ , Table S1) for each factor ( $j = A, B, C, D$ ). The mean value of  $K_{ji}$  is used to determine both the optimal level and the optimal combination of factors.  $R_j$  is defined as the difference

between the maximum and minimum mean value of  $K_{ji}$  and used for evaluating the significance of factors.<sup>2</sup>

As shown in Table S2, the best reaction condition is A3B2C3D2 i.e. 5.0 g dried coal sample and sodium hydroxide solution (300 mL, 0.21 mol/L) are mixed to react for 120 min.

## References

- 1 Y. Z. Liang, K. T. Fang and Q. S. Xu, *Chemometrics Intellig. Lab. Syst.*, 2001, **58**, 43-57.
- 2 X. Wu and D. Y. Leung, *Appl. Energ.*, 2011, **88**, 3615-3624.

**Table S1** Factor level table

| Factor level | Factor A (g) | Factor B (mL) | Factor C (min) | Factor D (°C) |
|--------------|--------------|---------------|----------------|---------------|
| 1            | 0.15         | 10            | 90             | 50            |
| 2            | 0.20         | 20            | 120            | 60            |
| 3            | 0.25         | 30            | 150            | 70            |

**Table S2** Orthogonal table

| Level                     | Factors |      |      |      | Results (%) |
|---------------------------|---------|------|------|------|-------------|
|                           | A       | B    | C    | D    |             |
| 1                         | 1       | 1    | 1    | 1    | 3.94        |
| 2                         | 1       | 2    | 2    | 2    | 4.46        |
| 3                         | 1       | 3    | 3    | 3    | 4.22        |
| 4                         | 2       | 1    | 2    | 3    | 4.58        |
| 5                         | 2       | 2    | 3    | 1    | 5.46        |
| 6                         | 2       | 3    | 1    | 2    | 4.44        |
| 7                         | 3       | 1    | 3    | 2    | 7           |
| 8                         | 3       | 2    | 1    | 3    | 6.22        |
| 9                         | 3       | 3    | 2    | 1    | 4.88        |
| Mean value K <sub>1</sub> | 4.21    | 4.91 | 4.87 | 4.76 |             |
| Mean value K <sub>2</sub> | 4.83    | 5.38 | 4.64 | 5.30 |             |
| Mean value K <sub>3</sub> | 6.03    | 4.51 | 5.56 | 5.01 |             |
| Range R                   | 1.82    | 0.87 | 0.92 | 0.54 |             |

**Table S3** Ultimate analysis of humic acids (wt.%)

| Ultimate analysis (daf) |      |      |      |                   |
|-------------------------|------|------|------|-------------------|
| C                       | H    | N    | S    | O <sub>diff</sub> |
| 72.93                   | 5.05 | 1.28 | 1.34 | 19.41             |

daf = dry and ash - free base; diff: by difference.

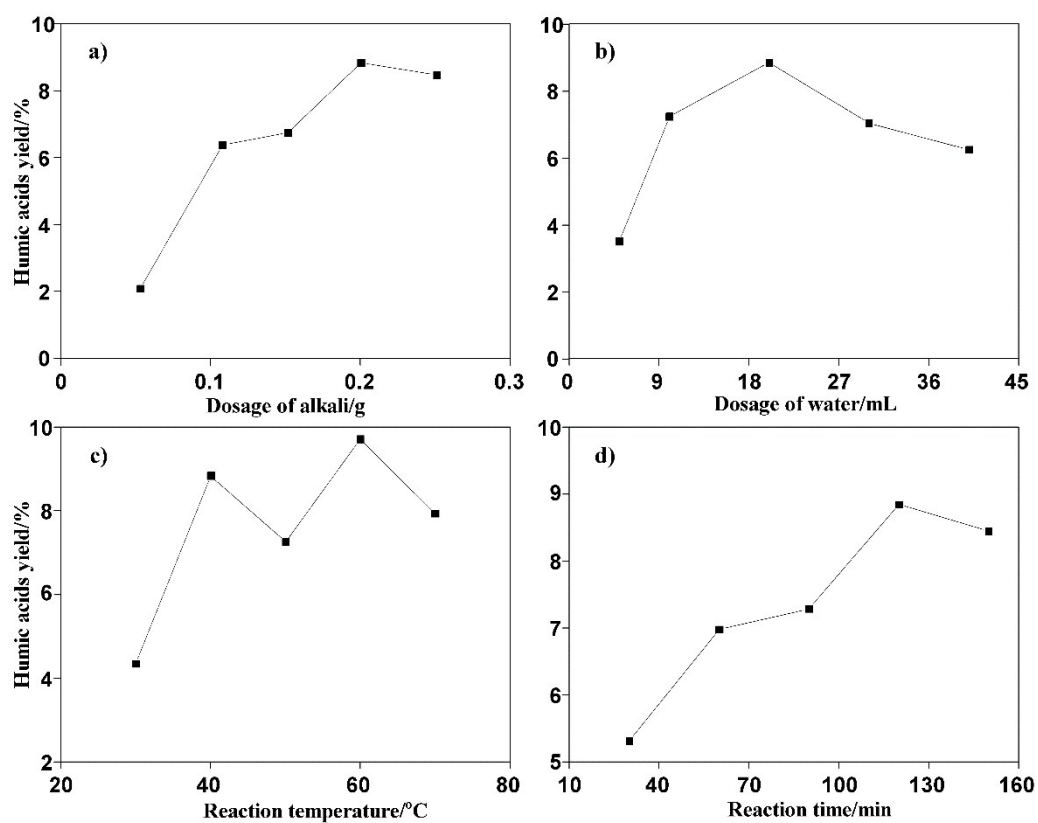

**Figure S1** Influence of a) dosage of NaOH, b) dosage of water, c) reaction temperature and d) reaction time for yield of humic acids

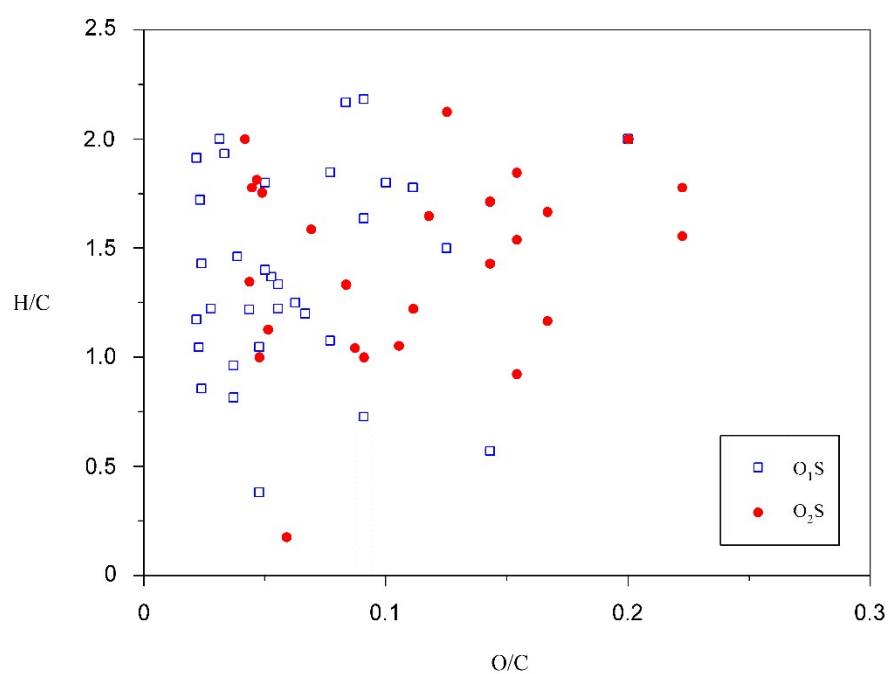

**Figure S2** van Krevelen diagram for  $O_1S$  and  $O_2S$  species

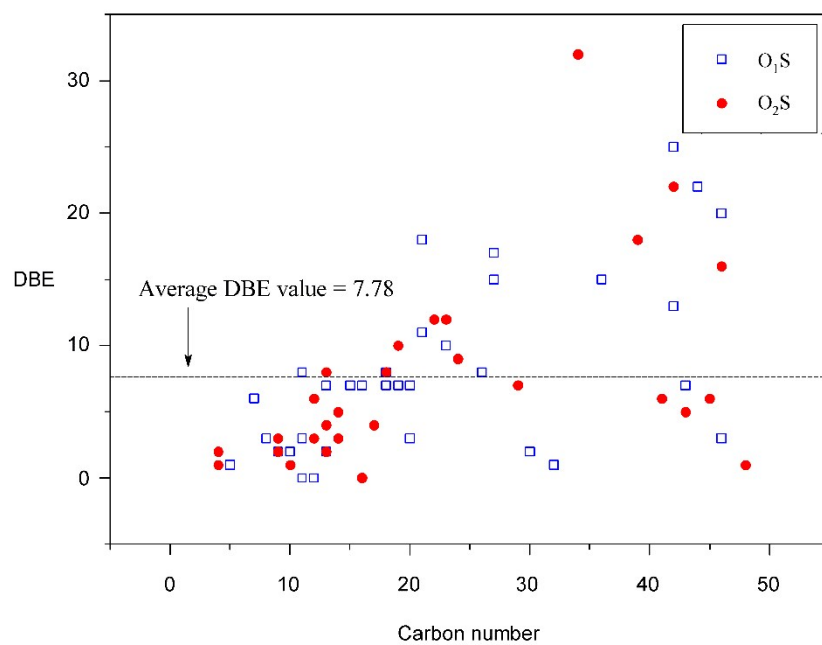

**Figure S3** DBE vs. carbon number for  $O_1S$  and  $O_2S$  species
